# Supplementary material
Source: Springer Nature journal article supplement (https://www.springermedizin.de/resource/supplementary/12884_2008_49_MOESM5_ESM.pdf/9459818)

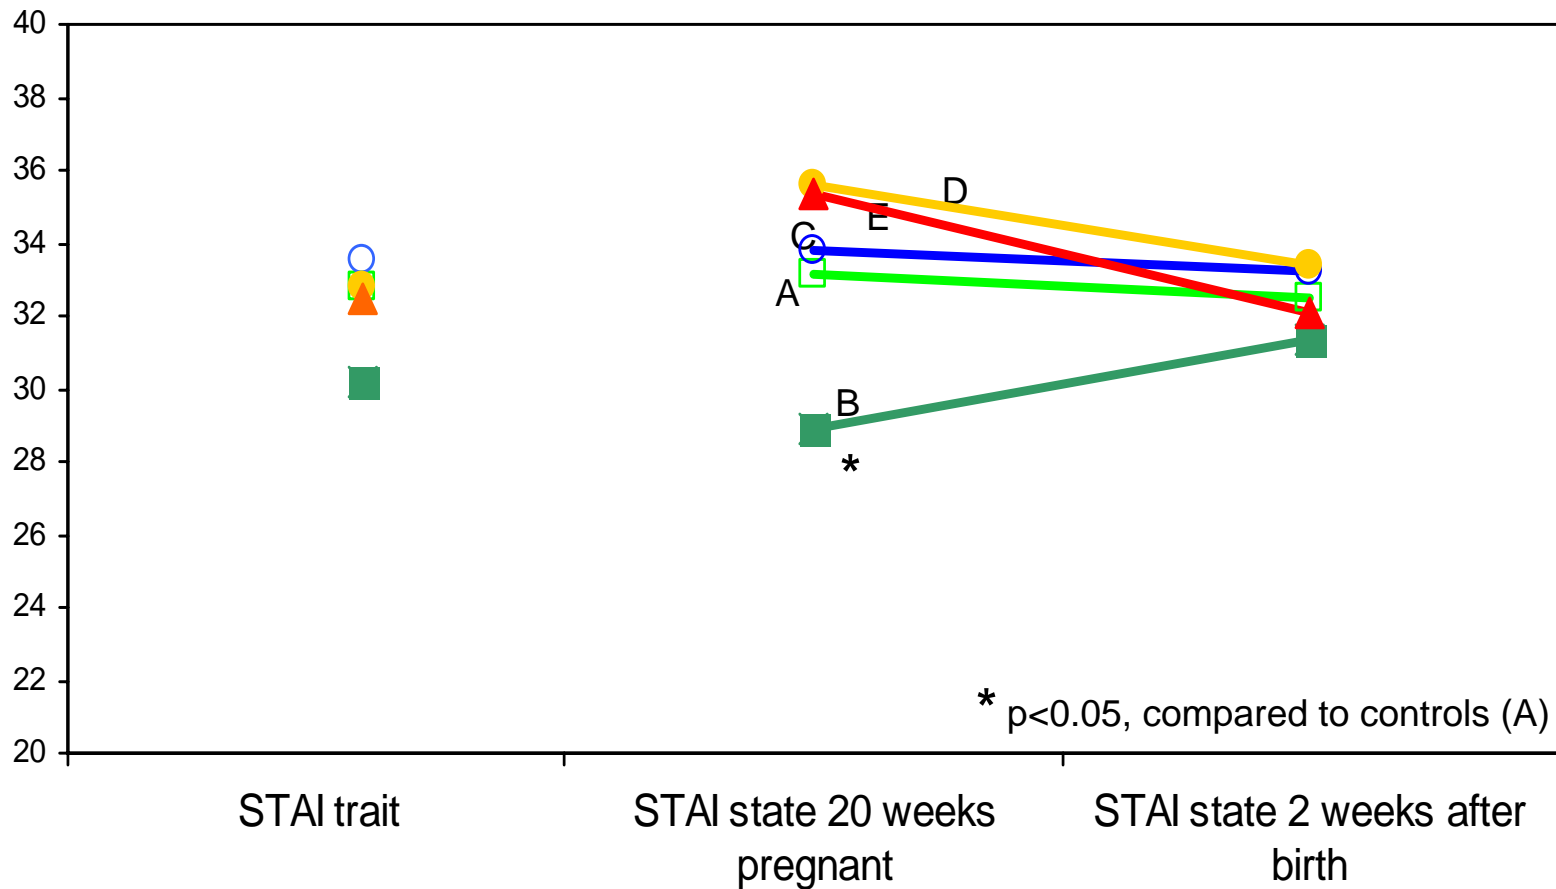

\*  $p < 0.05$ , compared to controls (A)

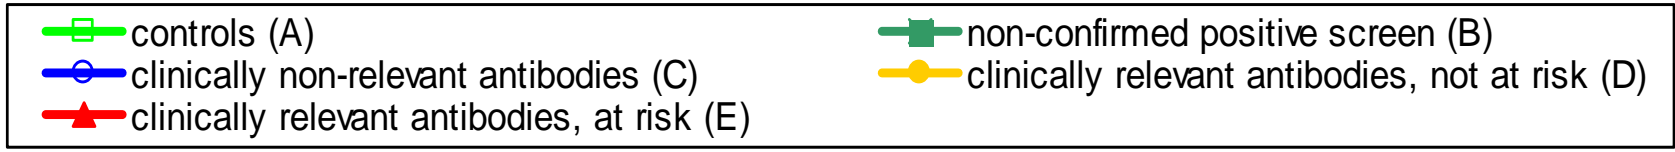

Supplement: MOESM5 [file 9459818]
